# Supplementary material for: Increased Circulating MicroRNA-155 as a Potential Biomarker for Breast Cancer Screening: A Meta-Analysis
Source: MDPI journal article supplement (doi:10.3390/molecules19056282), 2014-05-16
Supplement: s1 [file s1]

# Supplementary Material

**Table S1.** The quality assessment of diagnostic accuracy studies (QUADAS).

| Item No.     | Description                                                                                                                                                     | Zhao <i>et al.</i> | Sun <i>et al.</i> | Mar-Aguilar <i>et al.</i> |
|--------------|-----------------------------------------------------------------------------------------------------------------------------------------------------------------|--------------------|-------------------|---------------------------|
| 1            | Was the spectrum of patients representative of the patients who will receive the test in practice?                                                              | yes                | yes               | yes                       |
| 2            | Were selections criteria clearly described?                                                                                                                     | yes                | yes               | yes                       |
| 3            | Is the reference standard likely to correctly classify the target condition?                                                                                    | yes                | yes               | yes                       |
| 4            | Is the time period between reference standard and index test short enough to be reasonably sure that the target condition did not change between the two tests? | yes                | yes               | yes                       |
| 5            | Did the whole sample or a random selection of the sample receive verification using a reference standard of diagnosis?                                          | yes                | yes               | yes                       |
| 6            | Did patients receive the same reference standard regardless of the index test result?                                                                           | yes                | yes               | yes                       |
| 7            | Was the reference standard independent of the index test ( <i>i.e.</i> , the index test did not form part of the reference standard)?                           | yes                | yes               | yes                       |
| 8            | Was the execution of the index test described in sufficient detail to permit replication of the test?                                                           | yes                | yes               | yes                       |
| 9            | Was the execution of the reference standard described in sufficient detail to permit replication of the test?                                                   | yes                | yes               | yes                       |
| 10           | Were the index test results interpreted without knowledge of the results of the reference standard?                                                             | no                 | no                | no                        |
| 11           | Were the reference standard results interpreted without knowledge of the results of the index test?                                                             | yes                | yes               | yes                       |
| 12           | Were the same clinical data available when tests results were interpreted as would be available when the test is used in practice?                              | yes                | yes               | yes                       |
| 13           | Were uninterpretable/intermediate test results reported?                                                                                                        | no                 | yes               | no                        |
| 14           | Were withdrawals from the study explained?                                                                                                                      | yes                | yes               | yes                       |
| Total scores |                                                                                                                                                                 | 12                 | 13                | 12                        |
